# Supplementary material for: P-Functionalized and O-deficient TiOn/VOm nanoparticles grown on Ni foam as an electrode for supercapacitors: epitaxial grown heterojunction and visible-light-driven photoresponse
Source: Royal Society of Chemistry journal article supplement (doi:10.1039/d0dt00317d), 2020-01-01
Supplement: d0dt00317d1.pdf [file d0dt00317d1.pdf]

## Supporting Information

### P-functionalized and O-deficient $\text{TiO}_n/\text{VO}_m$ nanoparticles grown on Ni foam as electrode for supercapacitor: epitaxial grown heterojunction and visible-light-driven photoresponse

Keyu Tao, Lian Wang, Yang Hai and Yun Gong\*

Department of Applied Chemistry, College of Chemistry and Chemical Engineering, Chongqing University, Chongqing 401331, P. R. China. E-mail: gongyun7211@cqu.edu.cn; Tel: +86-023-65678932

**Table S1** The names of the samples synthesized under different conditions.

| Sample                                      | First-step hydrothermal synthesis |                                                                 | Second-step phosphorization    |                                   |
|---------------------------------------------|-----------------------------------|-----------------------------------------------------------------|--------------------------------|-----------------------------------|
|                                             | $\text{V}_2\text{O}_5$ (mg)       | $\text{H}_2\text{O}_2(\text{mL})/\text{H}_2\text{O}(\text{mL})$ | $\text{NaH}_2\text{PO}_2$ (mg) | $\text{TiCl}_4$ ( $\mu\text{L}$ ) |
| $\text{VO}_m/\text{NF}$                     | 20                                | 2/8                                                             | /                              | /                                 |
| P- $\text{VO}_m/\text{NF}$                  | 20                                | 2/8                                                             | 100                            | /                                 |
| P- $\text{TiO}_n$ - $\text{VO}_m/\text{NF}$ | 20                                | 2/8                                                             | 100                            | 50                                |
| P- $\text{TiO}_2$ - $\text{VO}_m/\text{NF}$ | 20                                | 2/8                                                             | 100                            | 150                               |

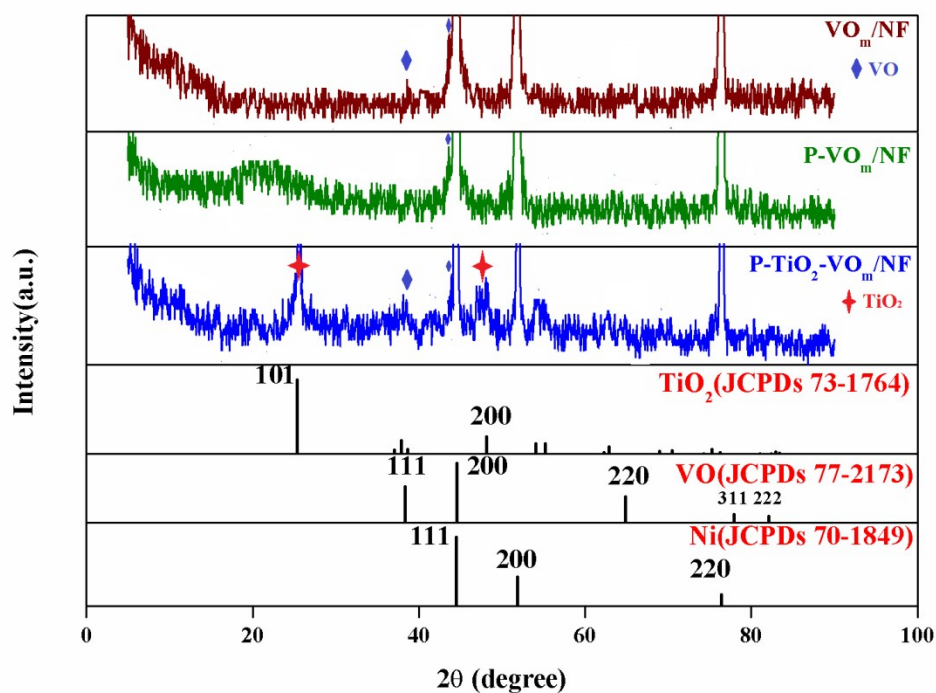

**Fig. S1** XRD patterns of  $\text{VO}_m/\text{NF}$ , P- $\text{VO}_m/\text{NF}$ , P- $\text{TiO}_2$ - $\text{VO}_m/\text{NF}$  and the standard

profiles.

**Table S2** The atomic percentages (at. %) in the samples.

| Sample | VO <sub>m</sub> /NF | P-VO <sub>m</sub> /NF | P-TiO <sub>n</sub> -VO <sub>m</sub> /NF |                    | P-TiO <sub>2</sub> -VO <sub>m</sub> /NF |
|--------|---------------------|-----------------------|-----------------------------------------|--------------------|-----------------------------------------|
|        |                     |                       | Before cycling test                     | After cycling test |                                         |
| Ni     | 71.8                | 11.1                  | 14.4/11.8                               | 25.7               | 5.6                                     |
| V      | 14.6                | 9.1                   | 32.9/9.8                                | 0.6                | 1.0                                     |
| O      | 13.6                | 50.4                  | 42.1/65.4                               | 63.1               | 66.6                                    |
| P      | /                   | 29.4                  | 9.1/8.4                                 | 9.1                | 3.6                                     |
| Ti     | /                   | /                     | 1.5/4.6                                 | 0.6                | 23.2                                    |
| K      | /                   | /                     | /                                       | 0.9                |                                         |

(a)

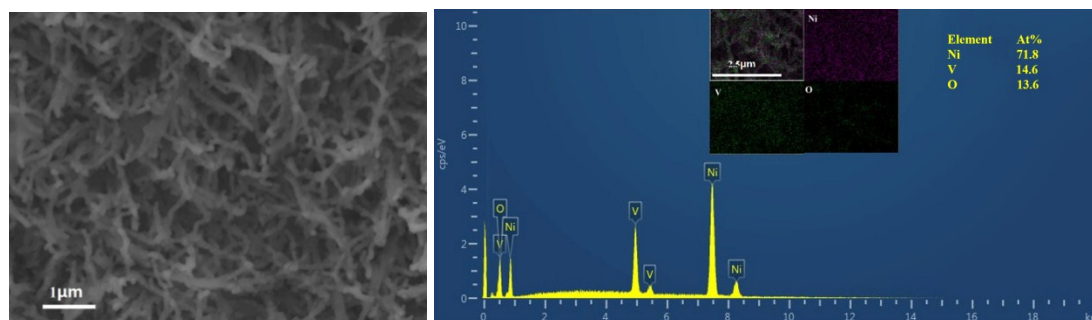

**Fig. S2** SEM (a) and EDS (b) as well as elemental mappings (inset) of VO<sub>m</sub>/NF.

(a)

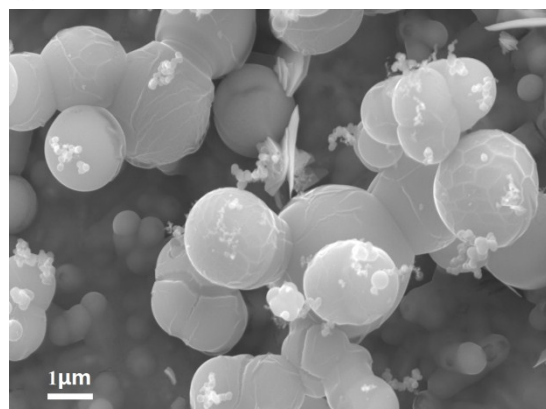

(b)

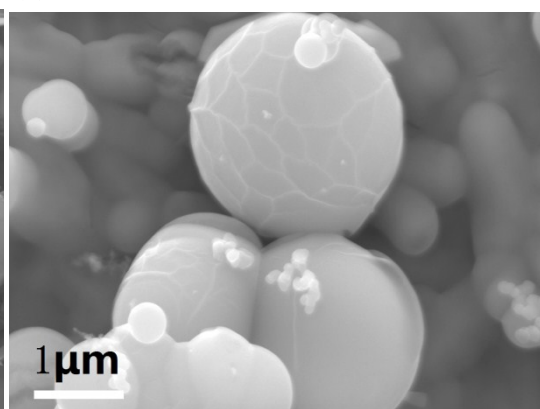

(c)

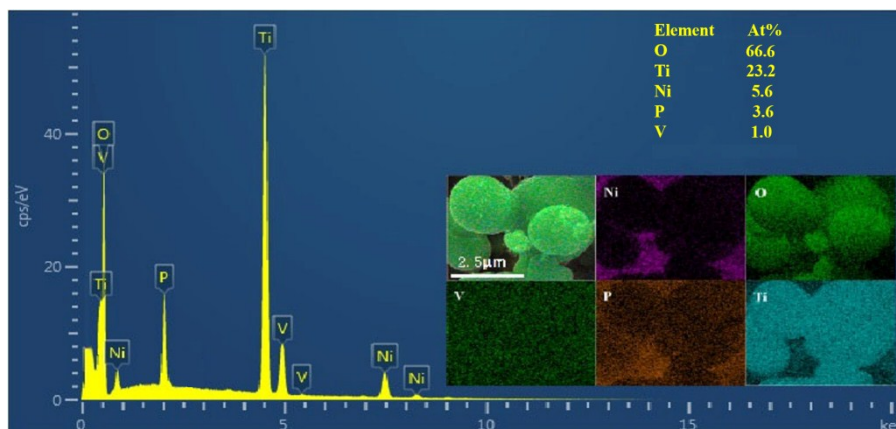

**Fig. S3** SEM (a, b) and EDS as well as elemental mappings (inset) (c) of P-TiO<sub>2</sub>-VO<sub>m</sub>/NF.

**Table S3** Comparison of XPS binding energies (eV) in VO<sub>m</sub>/NF, P-VO<sub>m</sub>/NF and P-TiO<sub>n</sub>-VO<sub>m</sub>/NF.

| Sample |                  | VO <sub>m</sub> /NF | P-VO <sub>m</sub> /NF | P-TiO <sub>n</sub> -VO <sub>m</sub> /NF |
|--------|------------------|---------------------|-----------------------|-----------------------------------------|
| Ni 2p  | Ni(0)            | 852.4               | 852.4                 | 852.4                                   |
|        | Ni <sup>2+</sup> | 856.2/873.7         | 856.2/873.7           | 856.2/873.7                             |
| V 2p   | V <sup>2+</sup>  | /                   | 512.6                 | /                                       |
|        | V <sup>4+</sup>  | 516.8               | 516.2/522.3           | 516.3                                   |
|        | V <sup>5+</sup>  | 517.5/524.5         | 518.0/524.2           | 517.2/524.5                             |
| O 1s   | Metal-O          | 530.4               | 531.1                 | 531.3                                   |
|        | -OH              | 531.8               | 532.4                 | 533.0                                   |
| P 2p   | Metal-P          | /                   | 129.0                 | 133.6                                   |
|        | P-O              | /                   | 129.2                 | 134.4                                   |
| Ti 2p  | Ti <sup>2+</sup> | /                   | /                     | 455.4/460.2                             |
|        | Ti <sup>3+</sup> | /                   | /                     | 456.8/462.0                             |
|        | Ti <sup>4+</sup> | /                   | /                     | 458.6/464.2                             |

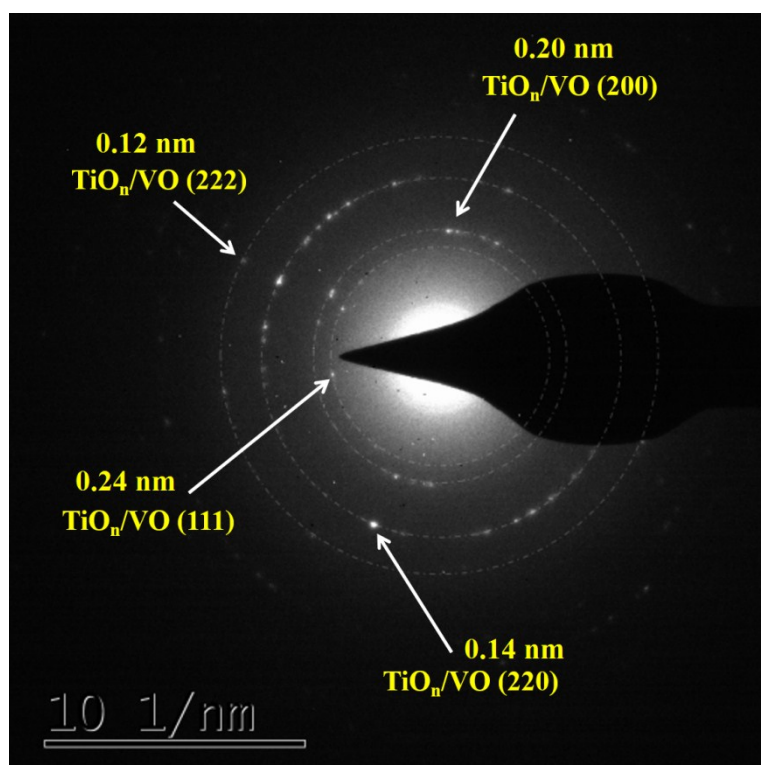

Fig. S4 SAED pattern of the nanoparticles in P-TiO<sub>n</sub>-VO<sub>m</sub>/NF.

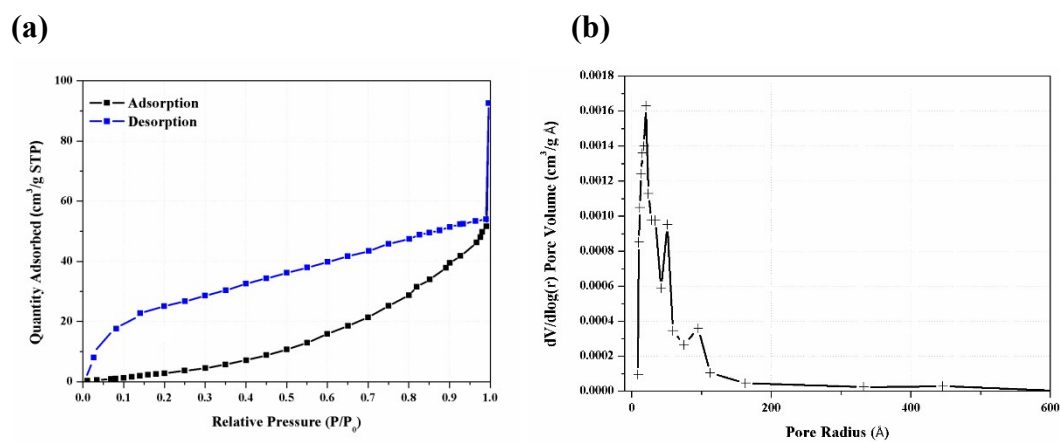

Fig. S5 Nitrogen adsorption/desorption isotherm curve (a) and pore size distribution curve (b) of P-TiO<sub>n</sub>-VO<sub>m</sub>/NF.

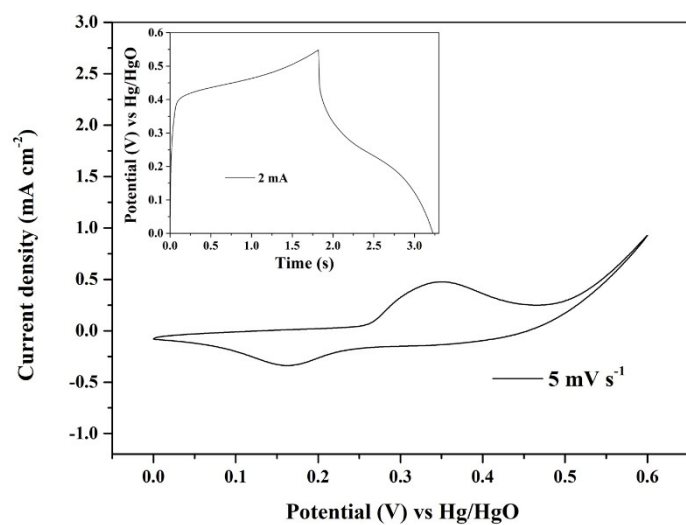

**Fig. S6** The electrochemical performance of PH<sub>3</sub> treated bare NF.

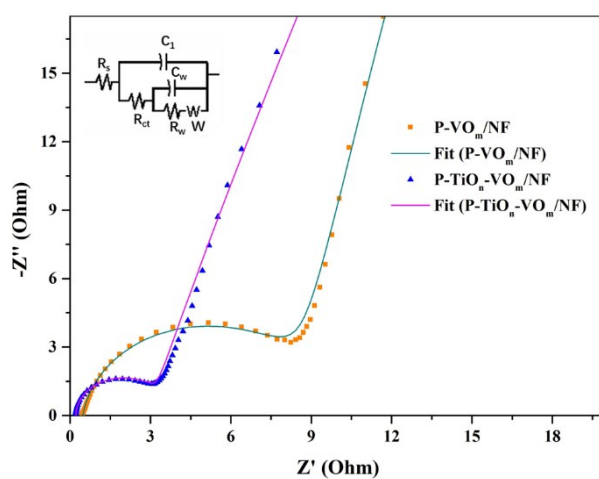

**Fig. S7** The EIS plots of P-VO<sub>m</sub>/NF and P-TiO<sub>n</sub>-VO<sub>m</sub>/NF.

(a)

(b)

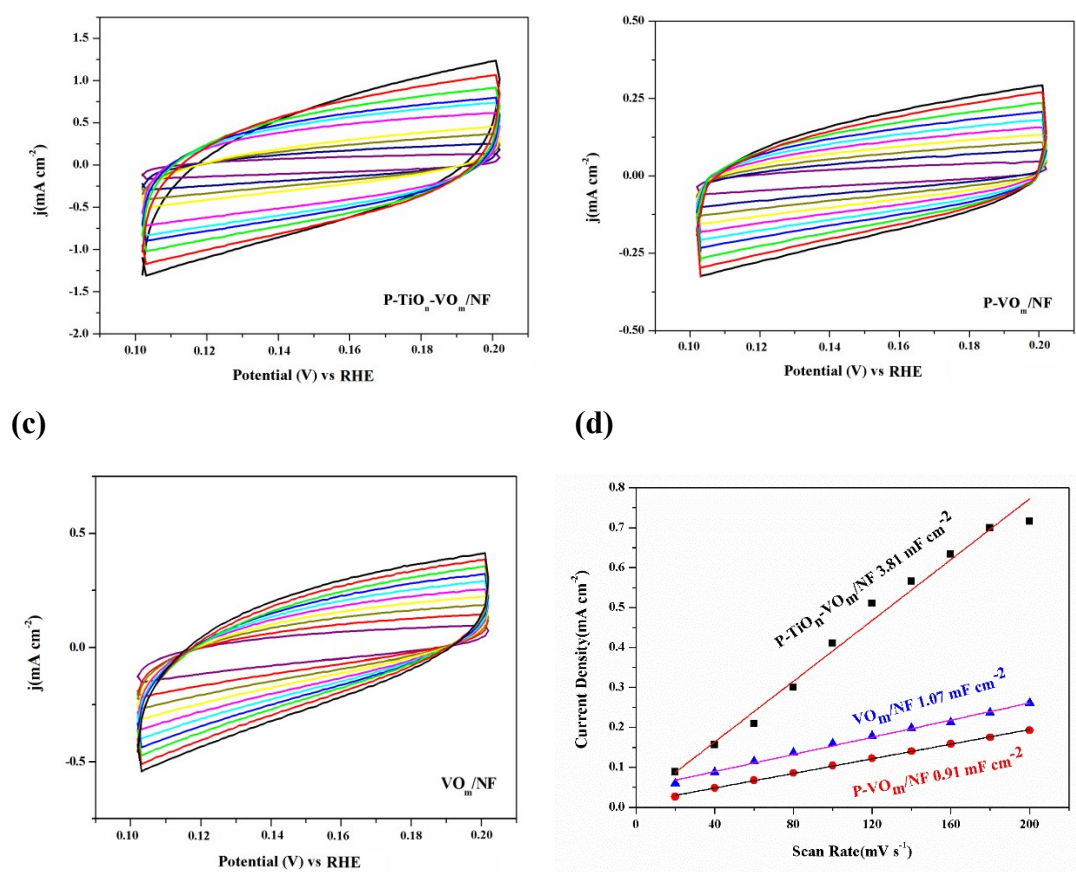

**Fig. S8** CV curves (20-200 mV s<sup>-1</sup>) at different scanning rates of P-TiO<sub>n</sub>-VO<sub>m</sub>/NF (a), P-VO<sub>m</sub>/NF (b) and VO<sub>m</sub>/NF (c). The relationship between capacitive currents at 0.15 V vs RHE and scanning rates (d).

**Table S4** Comparison of electrochemical performances of previous titanium oxides and vanadium oxides reported previously.

| Active material                                                                 | Specific capacity      | Electro-lyte                       | Super-capacitor                                                                      | Energy density/Power density                         | Capacity retention  | Ref. |
|---------------------------------------------------------------------------------|------------------------|------------------------------------|--------------------------------------------------------------------------------------|------------------------------------------------------|---------------------|------|
| OD-TiO <sub>2</sub> /G                                                          | 402 F g <sup>-1</sup>  | 1 M KOH                            | OD-TiO <sub>2</sub> /G//OD-TiO <sub>2</sub> /G                                       | 14.1 Wh kg <sup>-1</sup> /8.5 kW kg <sup>-1</sup>    | /                   | 1    |
| VO <sub>x</sub> @MoO <sub>3</sub>                                               | 683 F g <sup>-1</sup>  | 5 M KCl                            | VO <sub>x</sub> @MoO <sub>3</sub> //MnO <sub>2</sub>                                 | 1.63 mWh cm <sup>-3</sup> /0.0325 W cm <sup>-3</sup> | 87 % (9000 cycles)  | 2    |
| VO <sub>2</sub> /AEG                                                            | 78 mAh g <sup>-1</sup> | 4 M KOH                            | VO <sub>2</sub> /AEG//C-V <sub>2</sub> NO                                            | 41.6 Wh kg <sup>-1</sup> /904 W kg <sup>-1</sup>     | 93 % (10000 cycles) | 3    |
| GF+VO <sub>2</sub> /HMB                                                         | 485 F g <sup>-1</sup>  | 1 M K <sub>2</sub> SO <sub>4</sub> | GF+VO <sub>2</sub> /HM B//AC                                                         | 14.5 Wh kg <sup>-1</sup> /0.72 kW kg <sup>-1</sup>   | N/A                 | 4    |
| Co <sub>3</sub> O <sub>4</sub> /Co <sub>3</sub> (VO <sub>4</sub> ) <sub>2</sub> | 847 F g <sup>-1</sup>  | 2 M KOH                            | Co <sub>3</sub> O <sub>4</sub> /Co <sub>3</sub> (VO <sub>4</sub> ) <sub>2</sub> //AC | 38 Wh kg <sup>-1</sup> /275 W kg <sup>-1</sup>       | 95 % (5000 cycles)  | 5    |

|                                         |                       |                        |                                                      |                                                   |                     |                  |
|-----------------------------------------|-----------------------|------------------------|------------------------------------------------------|---------------------------------------------------|---------------------|------------------|
| HPCF@VN                                 | 241 F g <sup>-1</sup> | 6 M KOH                | HPCF@VN//Ni(OH) <sub>2</sub>                         | 39.3 Wh kg <sup>-1</sup> /400 W kg <sup>-1</sup>  | 78 % (10000 cycles) | 6                |
| VO(OH) <sub>2</sub> /CNT                | 512 C g <sup>-1</sup> | 1 M LiClO <sub>4</sub> | VO(OH) <sub>2</sub> /CNT//VO(OH) <sub>2</sub> /CNT   | 32.1 Wh kg <sup>-1</sup> /63.7 W kg <sup>-1</sup> | 90 % (2000 cycles)  | 7                |
| NiV <sub>2</sub> S <sub>4</sub>         | 639 C g <sup>-1</sup> | 6 M KOH                | Ni <sub>3</sub> (VO <sub>4</sub> ) <sub>2</sub> //AC | 45.1 Wh kg <sup>-1</sup> /240 W kg <sup>-1</sup>  | 91 % (2000 cycles)  | 8                |
| P-TiO <sub>n</sub> -VO <sub>m</sub> /NF | 785 C g <sup>-1</sup> | 2 M KOH                | P-TiO <sub>n</sub> -VO <sub>m</sub> /NF//AC          | 37.2 Wh kg <sup>-1</sup> /1 kW kg <sup>-1</sup>   | 80 % (10000 cycles) | <b>This work</b> |

**Table S5** Parameters in the equivalent circuits for P-TiO<sub>n</sub>-VO<sub>m</sub>/NF at different stages.

|                    | R <sub>s</sub><br>/Ω cm <sup>-2</sup> | C <sub>1</sub><br>/F cm <sup>-2</sup> | R <sub>ct</sub><br>/Ω cm <sup>-2</sup> | W<br>/Ω cm <sup>-2</sup> | R <sub>w</sub><br>/Ω cm <sup>-2</sup> | C <sub>w</sub><br>/F cm <sup>-2</sup> |
|--------------------|---------------------------------------|---------------------------------------|----------------------------------------|--------------------------|---------------------------------------|---------------------------------------|
| Initial            | 0.12                                  | 3.0×10 <sup>-4</sup>                  | 1.86                                   | 0.008                    | 0.01                                  | 1.2×10 <sup>-4</sup>                  |
| After 10000 cycles | 0.23                                  | 3.4×10 <sup>-4</sup>                  | 13.43                                  | 0.009                    | 0.01                                  | 2.3×10 <sup>-4</sup>                  |
| Under illumination | 1.33                                  | 4×10 <sup>-4</sup>                    | 1.39                                   | 0.007                    | 0.01                                  | 0.001                                 |

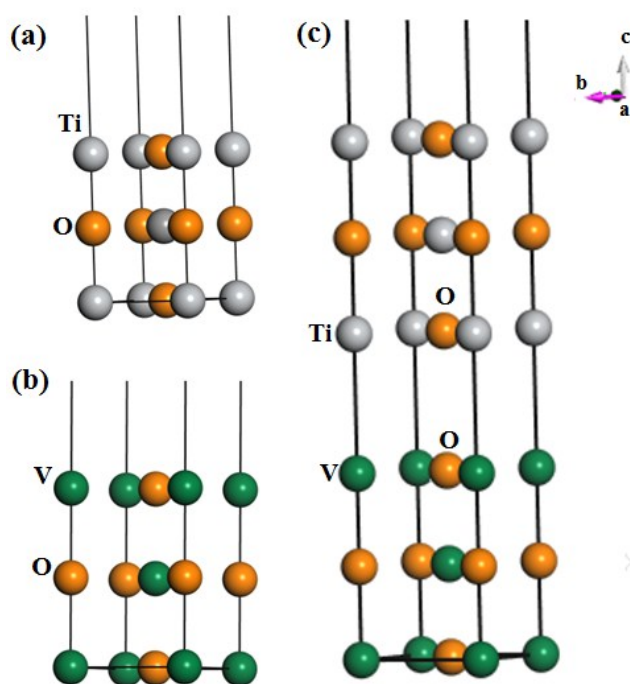

**Fig. S9** Crystal structures of (TiO<sub>1.250</sub>)<sub>3.07</sub> (a), VO (b) and (TiO<sub>1.250</sub>)<sub>3.07</sub>/VO (c). Color codes: grey, Ti; orange, O; olive, V.

(a)

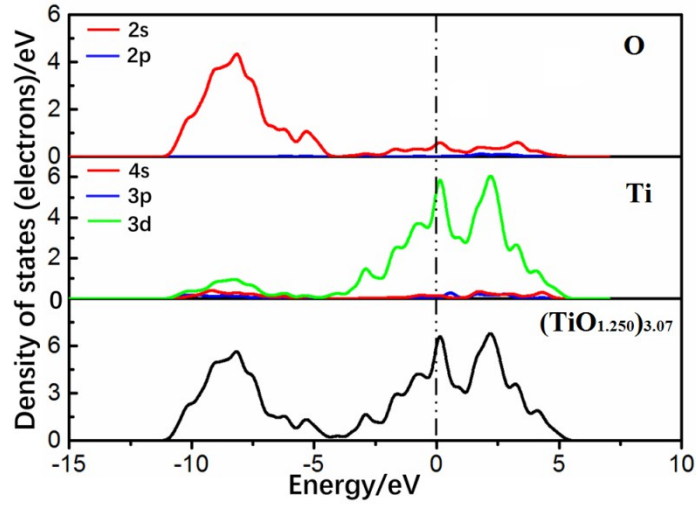

(b)

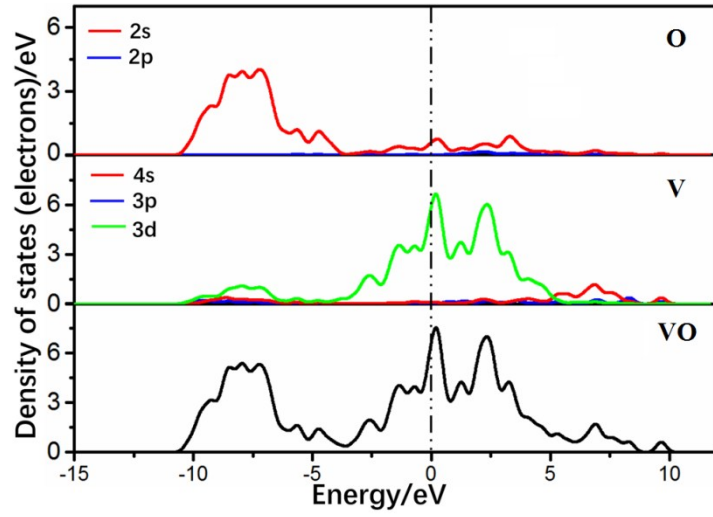

(c)

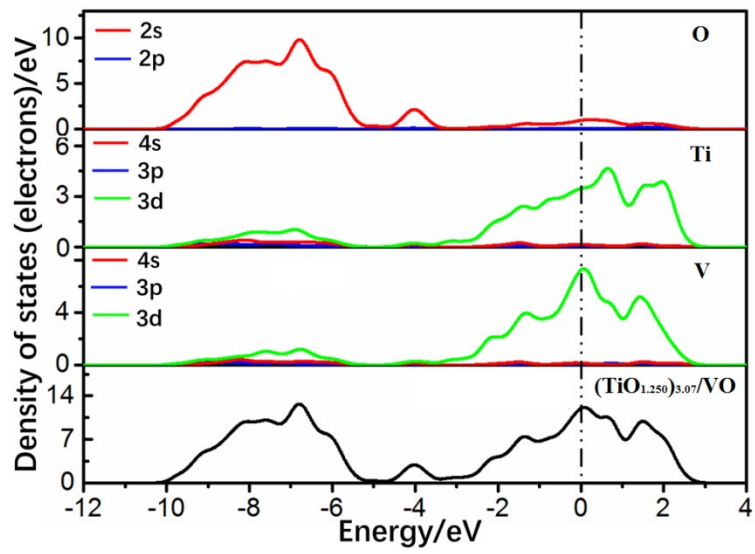



**Fig. S10** TDOS and PDOS of  $(\text{TiO}_{1.250})_{3.07}$  (a), VO (b) and  $(\text{TiO}_{1.250})_{3.07}/\text{VO}$  (c). Fermi level is denoted in dotted line. In the PDOS, blue, red and green lines represent s, p and d orbitals, respectively.

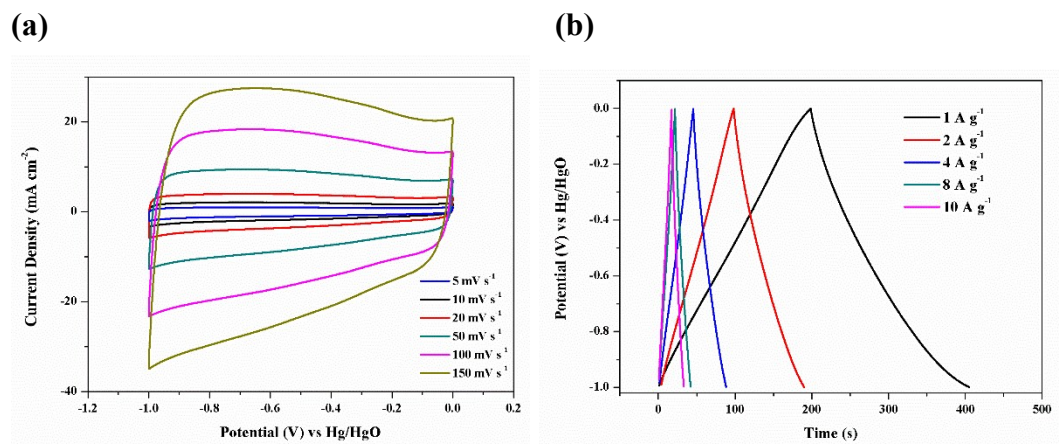

**Fig. S11** The electrochemical performance of activated carbon (AC) electrode: CV curves at different scanning rates (a) and GCD curves at different current densities (b).

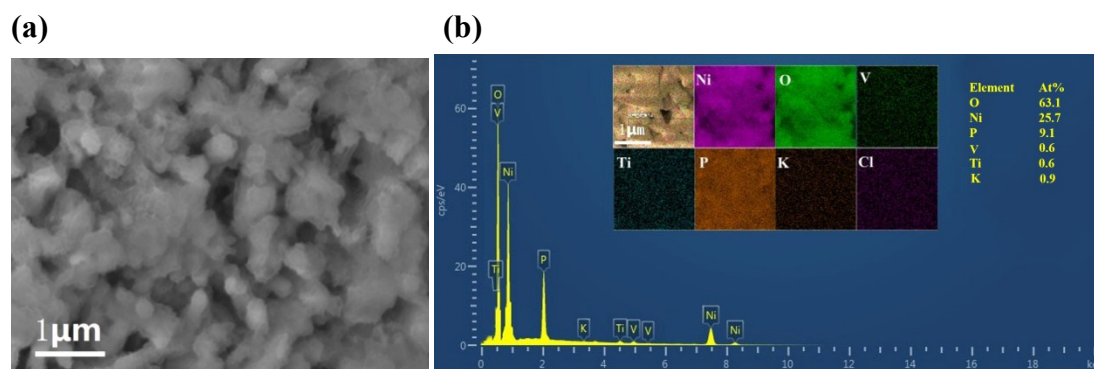

**Fig. S12** SEM (a) and EDS (b) as well as elemental mappings (inset) of  $\text{P-TiO}_n\text{-VO}_m/\text{NF}$  after 10000 GCD cycles

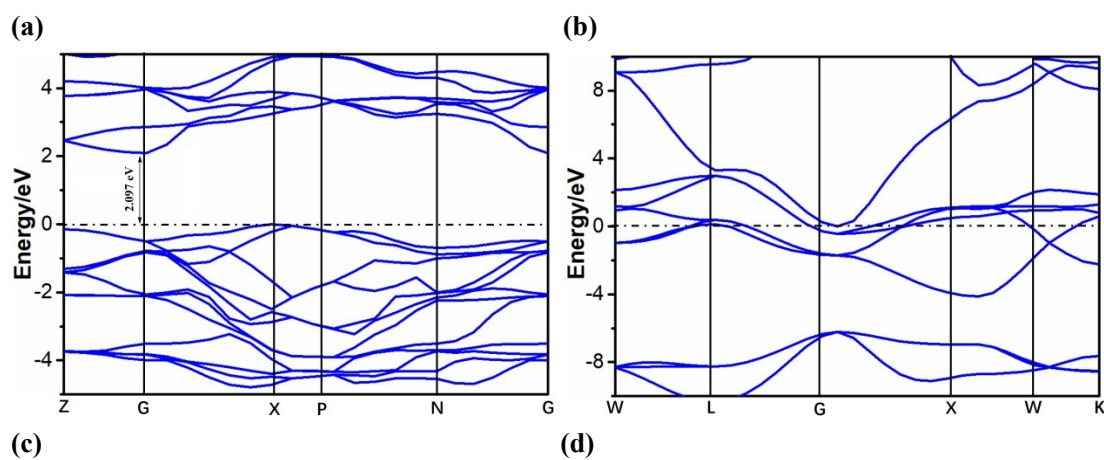

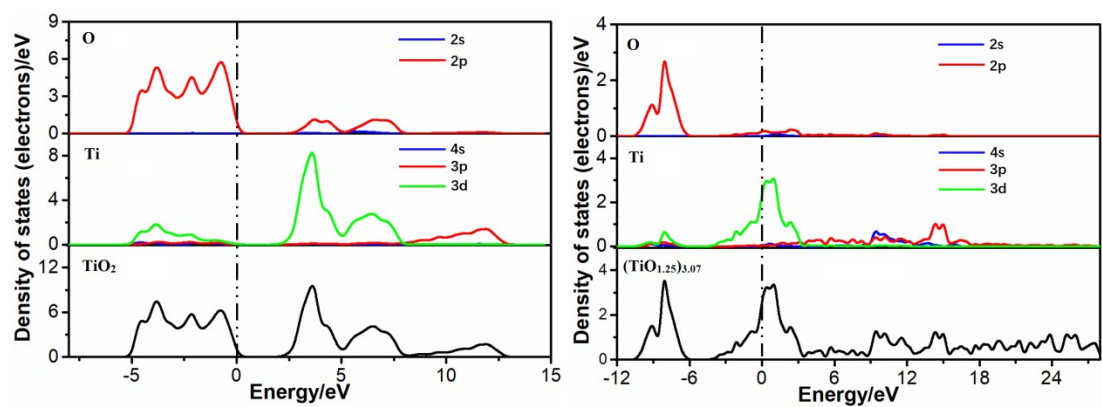

**Fig. S13** Band structures (**a, b**) and TDOS as well as PDOS (**c, d**) for the anatase-type  $\text{TiO}_2$  (**a, c**) and  $(\text{TiO}_{1.25})_{3.07}$  (**b, d**). Fermi level is denoted in dotted line. In the PDOS, blue, red and green lines represent s, p and d orbitals, respectively.

## References:

1. S. Yang, Y. Li, J. Sun and B. Cao, *Journal of Power Sources*, 2019, **431**, 220-225.
2. S. Q. Wang, X. Cai, Y. Song, X. Sun and X. X. Liu, *Advanced Functional Materials*, 2018, **28**, 1803901.
3. N. M. Ndiaye, N. F. Sylla, B. D. Ngom, F. Barzegar, D. Momodu and N. Manyala, *Electrochimica Acta*, 2019, **316**, 19-32.
4. X. Xia, D. Chao, C. F. Ng, J. Lin, Z. Fan, H. Zhang, Z. X. Shen and H. J. Fan, *Materials Horizons*, 2015, **2**, 237-244.
5. W.B. Zhang, L.B. Kong, X.J. Ma, Y.C. Luo and L. Kang, *Journal of Power Sources*, 2014, **269**, 61-68.
6. F. Ran, Y. Wu, M. Jiang, Y. Tan, Y. Liu, L. Kong, L. Kang and S. Chen, *Dalton Transactions*, 2018, **47**, 4128-4138.
7. M. Chen, Y. Zhang, Y. Liu, J. Zheng and C. Meng, *Applied Surface Science*, 2019, **492**, 746-755.
8. R. Kumar, P. Rai and A. Sharma, *Journal of Materials Chemistry A*, 2016, **4**, 17512-17520.
